# Supplementary material
Source: Research Square preprint supplement (doi:10.21203/rs.3.rs-9767920/v1)

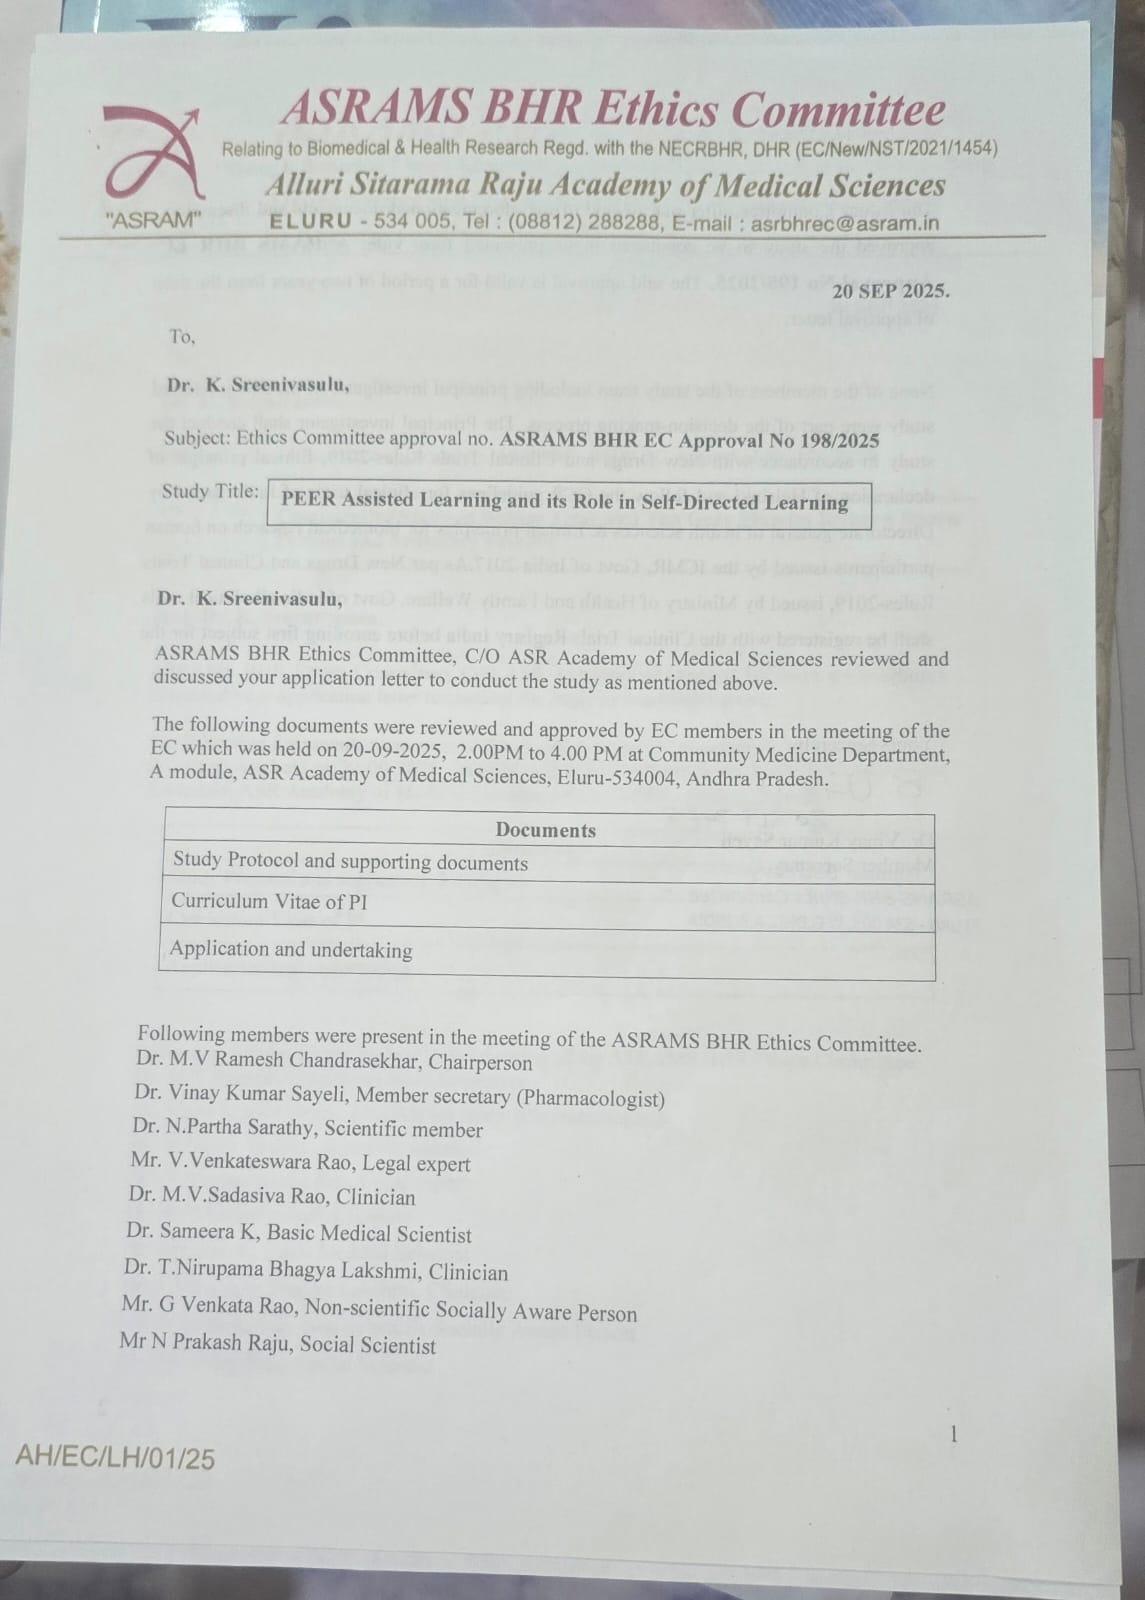


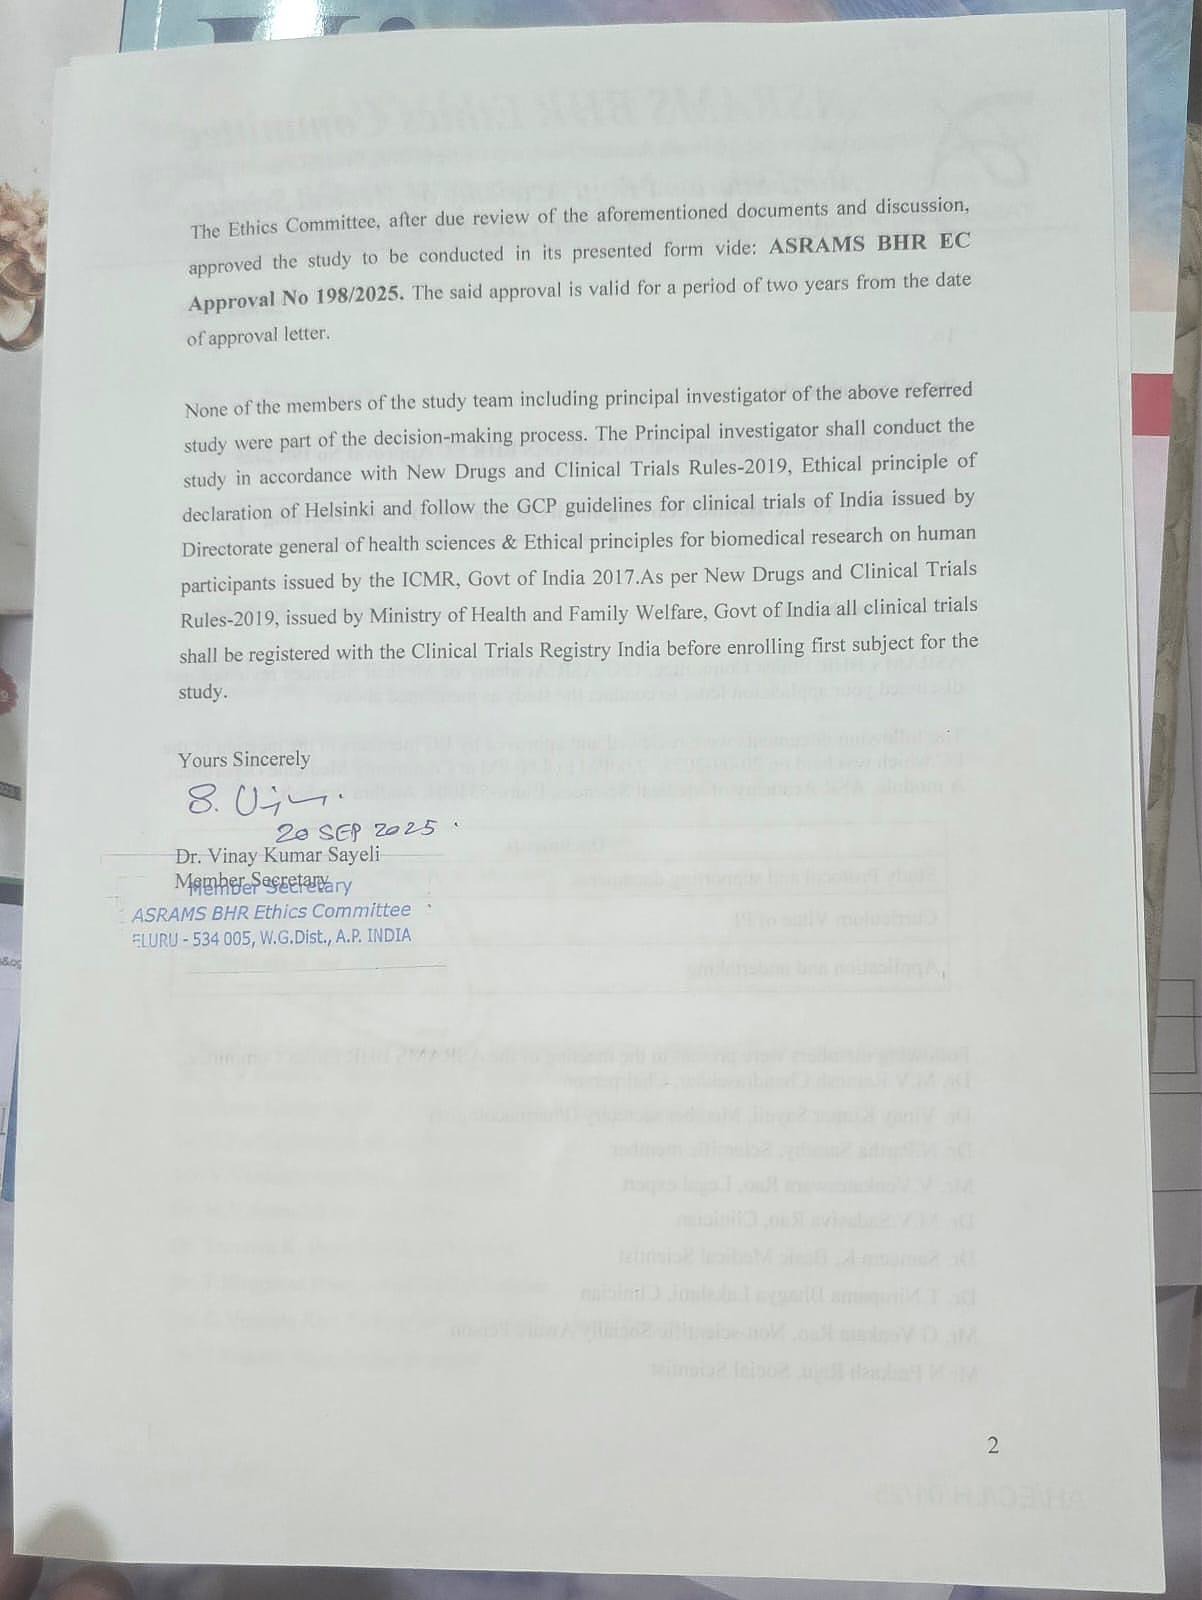

Supplement: Supplementary file 1 [file 50220a863b5a1bc0612e58c8.docx]
